# Supplementary material for: Reduced variability of neural progenitor cells and improved purity of neuronal cultures using magnetic activated cell sorting
Source: PubMed Central journal article supplement (PMC6436701; doi:10.1371/journal.pone.0213374), 2019-03-27
Supplement: pone.0213374.s007.pdf [file pone.0213374.s007.pdf]

| <b>Individual ID</b> | <b>Gender</b> | <b>Age</b> | <b>Ethnicity</b> |
|----------------------|---------------|------------|------------------|
| F12453               | Female        | 71         | Caucasian        |
| F13508               | Female        | 67         | Caucasian        |
| F12444               | Male          | 79         | Caucasian        |
| F0510                | Male          | Unknown    | Caucasian        |
| ND32951A             | Female        | Unknown    | Caucasian        |
| F11350               | Male          | Unknown    | Caucasian        |
