# Supplementary material for: Reduced variability of neural progenitor cells and improved purity of neuronal cultures using magnetic activated cell sorting
Source: PubMed Central journal article supplement (PMC6436701; doi:10.1371/journal.pone.0213374), 2019-03-27
Supplement: pone.0213374.s008.pdf [file pone.0213374.s008.pdf]

| Cell line ID | Sorting method | CD271+ | CD271- | CD271-<br>/CD133+ |
|--------------|----------------|--------|--------|-------------------|
| F12453-3B-1  | Unsorted       | 8.5    | 4.4    | 87.1              |
|              | FACS           | 0.3    | 1.0    | 98.7              |
|              | MACS           | 3.2    | 4.0    | 92.8              |
| F13508-4-1   | Unsorted       | 12.7   | 2.9    | 84.4              |
|              | FACS           | 0.5    | 1.5    | 98.0              |
|              | MACS           | 3.1    | 2.4    | 94.5              |
| F12444-3-2   | Unsorted       | 81.0   | 8.1    | 10.9              |
|              | FACS           | 0.6    | 1.5    | 97.9              |
|              | MACS           | -      | -      | -                 |
| F0510-2      | Unsorted       | 1.2    | 17.3   | 81.5              |
|              | FACS           | 0      | 2.6    | 97.4              |
|              | MACS           | 3.7    | 16.2   | 80.1              |
| ND32951A-15  | Unsorted       | 3.7    | 18.2   | 78.1              |
|              | FACS           | 1.5    | 5.8    | 92.7              |
|              | MACS           | 5.9    | 3.0    | 91.1              |
| F11350-1     | Unsorted       | 18.4   | 11.7   | 69.9              |
|              | FACS           | 6.3    | 9.7    | 84.0              |
|              | MACS           | 2.7    | 8.8    | 88.5              |
